# Supplementary material for: The higBA Toxin-Antitoxin Module From the Opportunistic Pathogen Acinetobacter baumannii – Regulation, Activity, and Evolution
Source: Front Microbiol. 2018 Apr 12;9:732. doi: 10.3389/fmicb.2018.00732 (PMC5906591; doi:10.3389/fmicb.2018.00732)
Supplement: Supplementary file 3 [file Table_3.DOCX]

Supplementary Material

The *higBA* Toxin-Antitoxin Module from the Opportunistic Pathogen *Acinetobacter baumannii* – Regulation, Activity and Evolution

Julija Armalytė*, Dukas Jurėnas, Renatas Krasauskas, Albinas Čepauskas, Edita Sužiedėlienė

*** Correspondence:** Julija Armalytė: julija.armalyte@gf.vu.lt

**Table S3.** *Acinetobacter* sp. plasmids, containing two *higBA*Ab versions. *higBA*Ab genes are indicated in blue and cyan, respectively. The maps were prepared by SnapGene.

| | Accession number | Size, kb | Plasmid name and comments | Plasmid map | | --- | --- | --- | --- | | CM008888 | 8.24 | *Acinetobacter baumannii* strain ZQ1 plasmid unnamed2  Two identical *higBA2*Ab |  | | CP010369 | 89.11 | *Acinetobacter nosocomialis* strain 6411 plasmid p6411  Two different *higBA2*Ab versions | 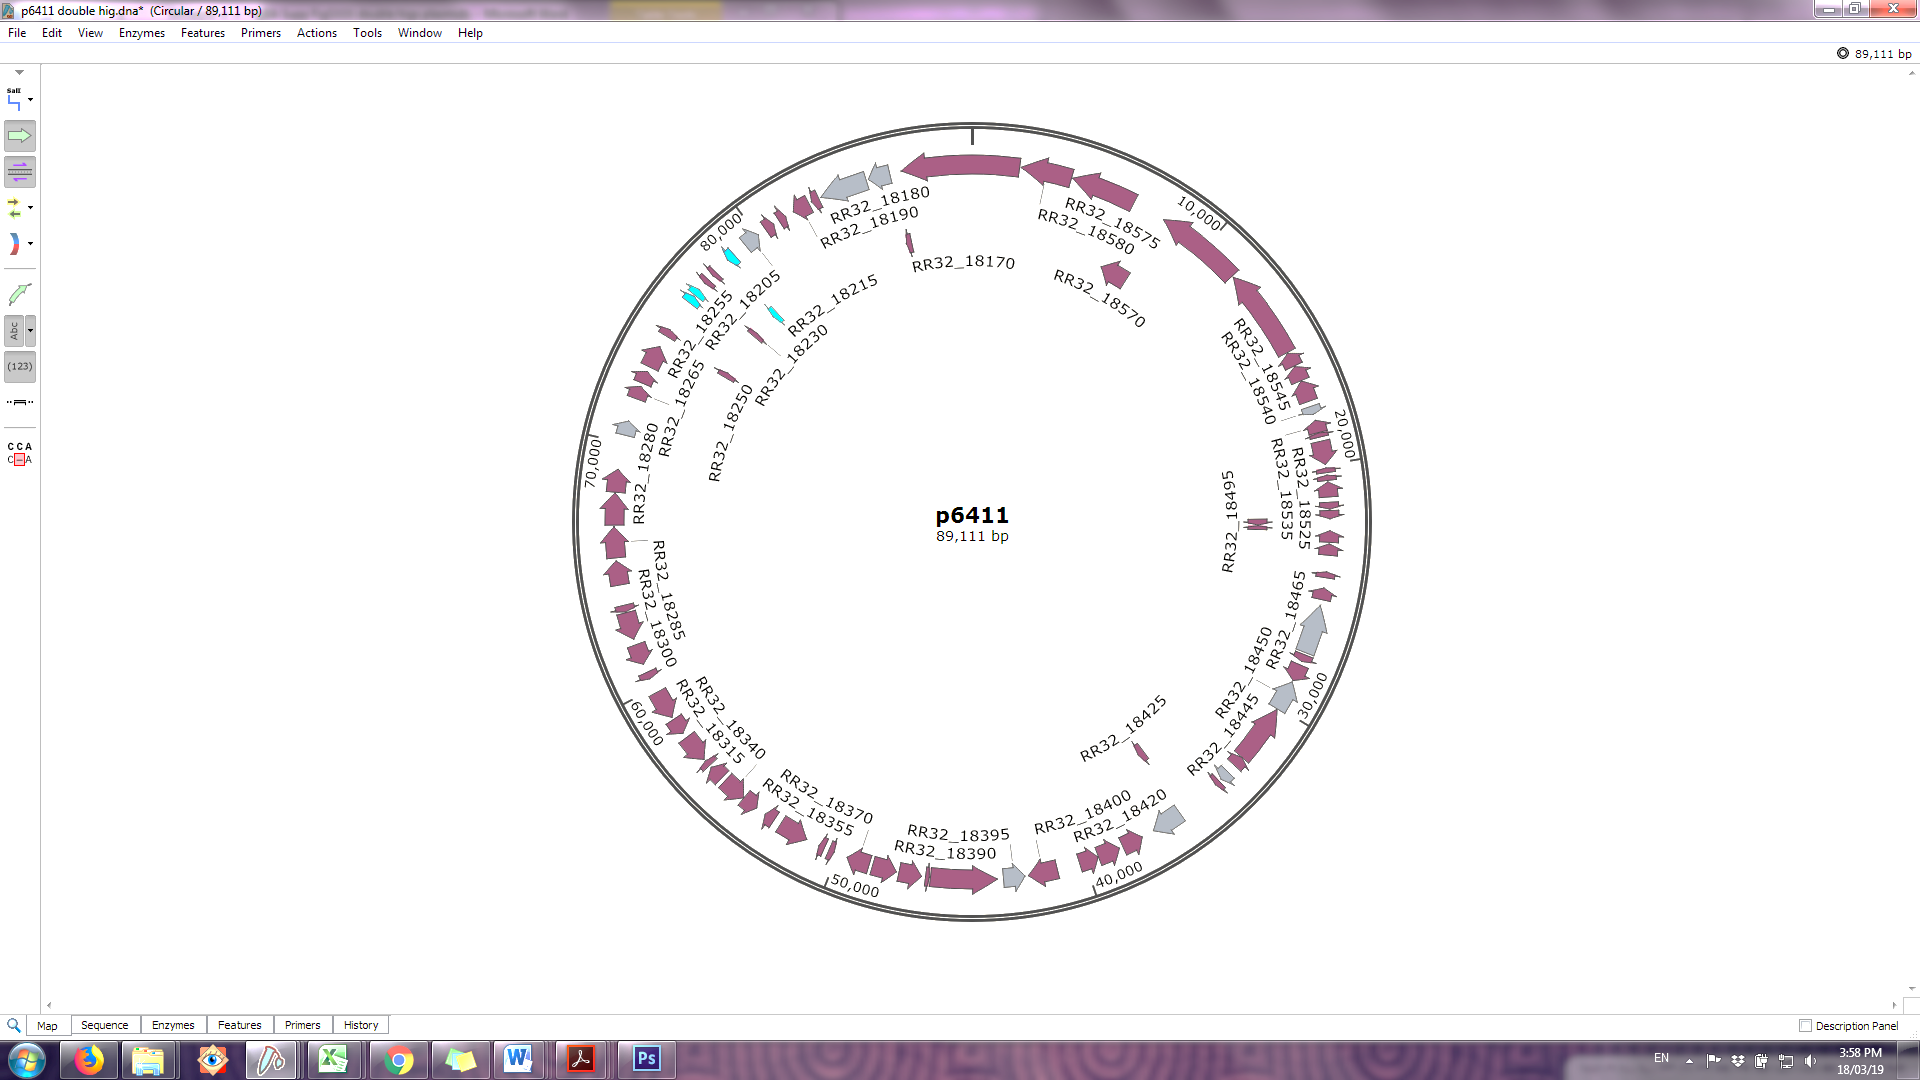 | |  |  |  |  | | CM001803 | 93.89 | *Acinetobacter calcoaceticus* subsp. *anitratus* XM1570 plasmid pXM2  Two different *higBA2*Ab versions |  | | NC_010404 | 94.41 | *Acinetobacter baumannii* str. AYE plasmid p3ABAYE  Two different *higBA2*Ab versions |  | |  |  |  |  | | NC_025173 | 94.42 | *Acinetobacter pittii* strain MS32 plasmid pMS32-1  Two different *higBA2*Ab versions |  | |
| --- | --- | --- | --- | --- | --- | --- | --- | --- | --- | --- | --- | --- | --- | --- | --- | --- | --- | --- | --- | --- | --- | --- | --- | --- | --- | --- | --- | --- | --- | --- | --- | --- |
|  |
